# Supplementary material
Source: Elsevier journal article supplement (https://www.sciencedirect.com/science/article/pii/S1413355522000508)
Supplement: mmc1 [file S1413355522000508:mmc1.pdf]

## Supplementary Material

| Challenges and Strategies for Cross-Cultural Pain Education and Exercises        |                                                                                                                                                                                                                                                                                                                                                                                                                                                                                                                                                                                                                                                                                                                                                                                                                                                                                                                                                                                                                                                                                                                                                                                            |
|----------------------------------------------------------------------------------|--------------------------------------------------------------------------------------------------------------------------------------------------------------------------------------------------------------------------------------------------------------------------------------------------------------------------------------------------------------------------------------------------------------------------------------------------------------------------------------------------------------------------------------------------------------------------------------------------------------------------------------------------------------------------------------------------------------------------------------------------------------------------------------------------------------------------------------------------------------------------------------------------------------------------------------------------------------------------------------------------------------------------------------------------------------------------------------------------------------------------------------------------------------------------------------------|
| Challenges                                                                       | Strategies                                                                                                                                                                                                                                                                                                                                                                                                                                                                                                                                                                                                                                                                                                                                                                                                                                                                                                                                                                                                                                                                                                                                                                                 |
| Expand the availability of precise and culturally adapted information about pain | <ul style="list-style-type: none"> <li>Consider educating different healthcare professionals in primary care about the influence of culture on pain.</li> <li>Consider developing informative materials about pain respecting all age groups, sex, race/ethnicity, language, educational and social status, religion, and other cultural aspects.</li> <li>Consider different formats to deliver culturally appropriate pain education (group concepts, stories, metaphors, emails, text message, booklets, videos, mobile App, and board games).</li> <li>Increase accessibility to remote areas and to minorities.</li> <li>Consider spreading precise culturally adapted information about pain in different languages in the media.</li> <li>Consider including participation of persons from the targeted population in the development phase.</li> </ul>                                                                                                                                                                                                                                                                                                                             |
| Clinicians' behavior in the clinical setting                                     | <ul style="list-style-type: none"> <li>Listen to the patient with positive and respectful attitudes (e.g. empathy, flexibility, and openness) without judgment.</li> <li>Take cues about verbal and nonverbal communication patterns of the patient's culture (e.g. pattern of tone of voice, eye contact, use of space, and conversational pace).</li> <li>In case of cultural error, express regret about the offensive behavior and express a willingness to learn about the patient's cultural needs (a patient or family may be offended by the clinician's words or actions).</li> </ul>                                                                                                                                                                                                                                                                                                                                                                                                                                                                                                                                                                                             |
| Pain Education in a clinical setting                                             | <ul style="list-style-type: none"> <li>Consider obtaining background information about the patient's culture.</li> <li>Be aware of the impact that culture has on beliefs, values, practices, preferences, and expectations.</li> <li>Consider that learning relies on patients' needs and context.</li> <li>Consider a patient-centered approach, where the patient has a central role in knowledge sharing.</li> <li>Consider using cultural words and expressions about pain.</li> <li>Provide materials in the native language (and ensure that participants can identify with or relate to the images and content).</li> </ul>                                                                                                                                                                                                                                                                                                                                                                                                                                                                                                                                                        |
| Exercise Program                                                                 | <ul style="list-style-type: none"> <li>Develop a mutually agreeable culturally sensitive plan of care.</li> <li>Investigate prior experiences, beliefs, and misconceptions about movement and exercises, norms, and the readiness to participate.</li> <li>Discuss if the patient prefers individual or group exercise sessions (private or group sessions with other members of the same community or groups (e.g., same-sex only group).</li> <li>Consider other places such as churches or public places in the patient's community as options for the exercise program.</li> <li>Consider cultural connectedness (i.e. family and member of the same community) in group sessions for some cultures.</li> <li>Discuss the preference for physical activities that are culturally acceptable, popular, and also available to those with limited financial resources (e.g. dancing, walking, jogging).</li> <li>Consider taking into account in the exercise plan occupation, transportation (biking or walking may be common in some cultural groups), household and care taking, and sports and leisure activities.</li> <li>Consider adopting a peer-led exercise program.</li> </ul> |
